# Supplementary material
Source: publisher figshare collection journal article supplement (https://karger.figshare.com/ndownloader/files/28882569)
Supplement: Supplementary file 1 [file 28882569]

| PATIENT  NUMBER | AGE (years) | SEX | OTHER ALLERGIC DISEASE | OFFENDING FOODS | TIME LATENCY  (hour) | SYMPTOMS | MULLER GRADING | COFACTORS | SPTs | | | | PbP  (mm) | sIgE  (kUa/L) | | | |
| --- | --- | --- | --- | --- | --- | --- | --- | --- | --- | --- | --- | --- | --- | --- | --- | --- | --- |
| **Cypress**  **Pollen**  **extract** | **Pru p 3-enriched peach peel extract** | **Profillin**  **extract** | |  | **Pru p 1** | **Pru p 3** | **Pru p 4** | **Pru p 7** | |
|  |  |  |  |  |  |  |  |  |  |  | |  |  |  |  |  |  | |
| **1** | 14 | M | OR, BA | Strawberry | Not known | U, DY | 2 | Exercise | 3 | 5 | | 0 | Strawberry 4  Peach 5 | 0.01 | 0.09 | 0.01 | 1.9 | |
| **2** | 15 | M | - | Peach, apple, lemon, orange | 1 | U, DY | 2 | Exercise | 4 | 4 | | 0 | Peach 7  Apple 6  Lemon 10  Orange 6 | 0.12 | 0.03 | 0.05 | 50.6 | |
| **3** | 9 | M | OR, BA | Peach | 2 | U | 1 | - | 4 | 6 | | 0 | Peach 3 | 0 | 0.04 | 0.01 | 30.3 | |
| **4** | 9 | F | OR | Peach | 3 | U, AN, BS | 3 | - | 3 | 5 | | 0 | Peach 6 | 0 | 0.02 | 0.05 | 35.9 | |
| **5** | 13 | F | OR,BA | Peach | 3 | SY, DY, V | 4 | Exercise | 5 | 5 | | 0 | Peach 4 | 0.03 | 0.06 | 0.09 | 83 | |
| **6** | 10 | M | OR | Strawberry, apple, plum | 0.5 | U, AN, BS, OAS | 3 | - | 3 | 3 | | 0 | Peach 6  Apple 2  Strawberry 4  Plum 6 | 1.59 | 0.02 | 0 | 31.8 | |
| **7** | 12 | F | OR | Not identified | 2 | U, AN, DY, OAS | 2 | - | 3 | 6 | | 0 | Peach 3  Apple 5  Orange 4  Plum 3 | 0.08 | 002 | 0.04 | 15.1 | |
| **8** | 16 | M | OR,BA | Peach, cherry | 1 | U, DY | 2 | Exercise | 4 | 5 | | 0 | Peach 4 | 0 | 0,01 | 0 | 1.78 | |
| **9** | 8 | M | OR,AD | Peach, lemon, orange | 3 | U, AN, LE | 2 | - | 4 | 4 | | 0 | Peach 4  Lemon 4  Orange 3 | 0 | 0.02 | 0 | 2.53 | |
| **10** | 17 | M | OR,AD | Peach | 0.5 | U, DY, AP | 3 | - | 5 | 4 | | 0 | Peach 7 | 0 | 0.02 | 0.03 | 6.37 | |

**Table 1**. Demographic data, clinical characteristics and results of the allergy tests of the patients studied. AD, atopic dermatitis; AN, angioedema; AP, abdominal pain; BA, bronchial asthma; BS, bronchospasm; DY, dyspnea; LE, laryngeal oedema; OAS, oral allergy syndrome; OR, oculorhinitis; SY, syncope; U, urticaria; V, vomiting.
